# Supplementary material for: Phenotypic and Genetic Evolutions of a Porcine Reproductive and Respiratory Syndrome Modified Live Vaccine after Limited Passages in Pigs
Source: MDPI journal article supplement (doi:10.3390/vaccines9040392), 2021-04-16
Supplement: s1 [file vaccines-1144520-supplementary.pdf › vaccines-1144520-supplementary.pdf]

# Supplementary Materials:

**Table S1:** Presentation of the vaccine strains isolated from vaccinated and contact pigs from Trial#1 and Trial#2.

| Trial | Inoculated<br>or<br>Contact pig | Pen | Pig No.   | Dpi selected<br>for DV<br>strain<br>isolation |
|-------|---------------------------------|-----|-----------|-----------------------------------------------|
| #1    | Inoc                            | 1   | 2012_1    | 14                                            |
|       | Inoc                            | 1   | 2012_2    | 10                                            |
|       | Inoc                            | 1   | 2012_3    | 7                                             |
|       | Cont                            | 1   | 2012_4    | 14                                            |
|       | Cont                            | 1   | 2012_5    | 21                                            |
|       | Cont                            | 1   | 2012_6 ** | 21                                            |
|       | Inoc                            | 2   | 2012_7 *  | 14                                            |
|       | Inoc                            | 2   | 2012_8    | 10                                            |
|       | Inoc                            | 2   | 2012_9    | 10                                            |
|       | Cont                            | 2   | 2012_10   | 17                                            |
|       | Cont                            | 2   | 2012_11   | 24                                            |
| #2    | Inoc                            | 1   | 2017_12   | 10                                            |
|       | Inoc                            | 1   | 2017_13   | 14                                            |
|       | Inoc                            | 1   | 2017_14   | 14                                            |
|       | Cont                            | 1   | 2017_15   | 21                                            |
|       | Cont                            | 1   | 2017_16   | 17                                            |
|       | Cont                            | 1   | 2017_17   | 24                                            |
|       | Inoc                            | 2   | 2017_18   | 14                                            |
|       | Inoc                            | 2   | 2017_19   | 17                                            |
|       | Inoc                            | 2   | 2017_20   | 17                                            |

|      |   |         |    |
|------|---|---------|----|
| Cont | 2 | 2017_21 | 24 |
| Cont | 2 | 2017_22 | 21 |
| Cont | 2 | 2017_23 | 24 |

The days post-infection (dpi) chosen for the DV strain isolation was selected at viremia peak for each pig. Dpi, days post-infection; inoc, inoculated; cont, contact. \* Isolate from the pig No. 2012\_7 was used as inoculum in Inoc-N-Rev-T#3 inoculated pigs from Trial#3. \*\* Isolate from the pig No. 2012\_6 was used as inoculum in Inoc-Rev-T#3 inoculated pigs from Trial#3.

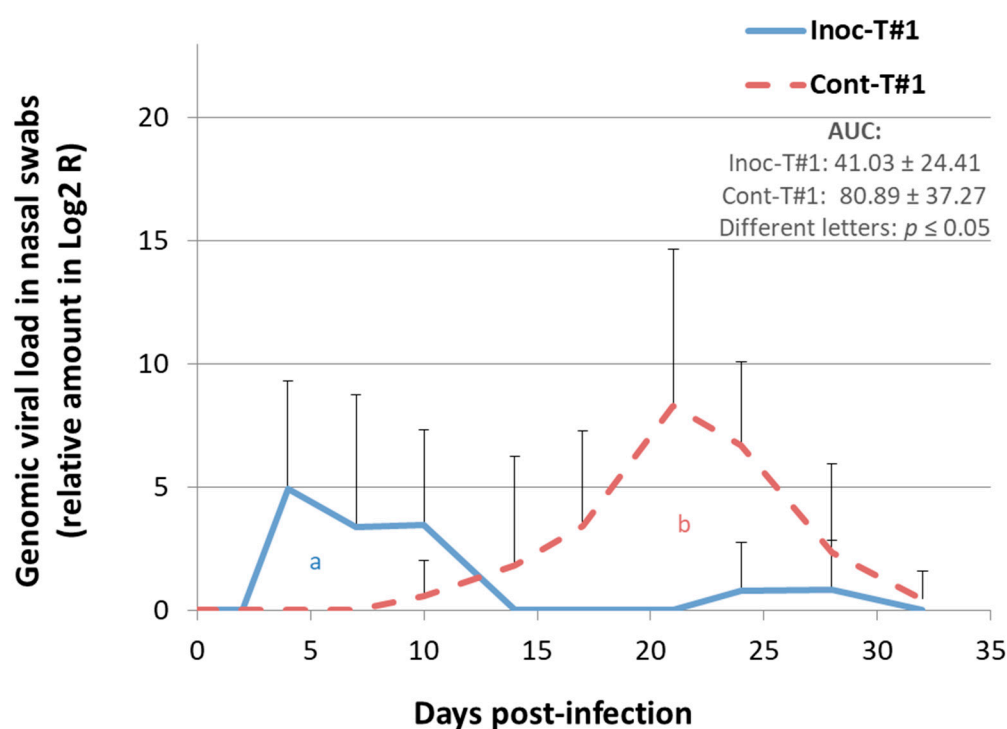

**Figure S1:** Evolution of the mean genomic viral loads (relative amount expressed in Log2 R) in inoculated Inoc-T#1 and contact Cont-T#1 pigs in nasal swab supernatants after inoculation (day 0) during Trial#1. Different letters ("a" and "b") indicate that the groups are significantly different from each other after comparison of Area Under the Curve (AUC) values with  $p \leq 0.05$ .

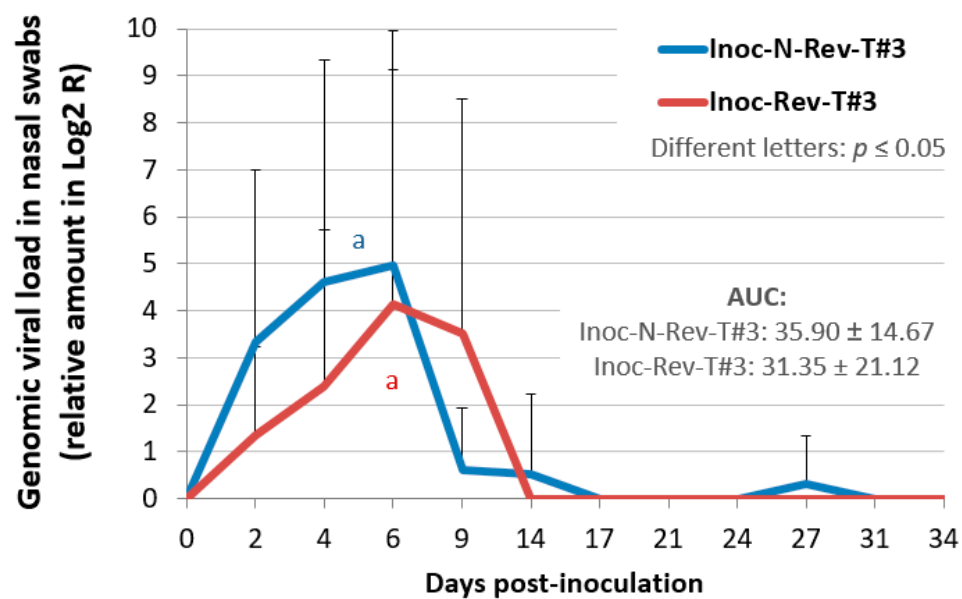

**Figure S2:** Evolution of the mean genomic viral loads (relative amount expressed in Log2 R) in Inoc-N-Rev-T#3 and Inoc-Rev-T#3 inoculated pigs in nasal swab supernatants after inoculation (day 0) during Trial#3. Different letters indicate that the groups are significantly different from each other after comparison of of Area Under the Curve (AUC) values with  $p \leq 0.05$ .

| P1-I-2012 |      |        |      |        |     |          |      |        |      |        |     |
|-----------|------|--------|------|--------|-----|----------|------|--------|------|--------|-----|
| 2012_1    |      | 2012_2 |      | 2012_3 |     | 2012_7 * |      | 2012_8 |      | 2012_9 |     |
| nt        | aa   | nt     | aa   | nt     | aa  | nt       | aa   | nt     | aa   | nt     | aa  |
|           |      |        |      | T>G    | L>W |          |      | T>G    | L>W  | T>G    | L>W |
|           |      |        |      | 1066   | 282 |          |      | 1066   | 282  | 1066   | 282 |
|           |      |        |      |        |     |          |      |        |      |        |     |
|           |      | T>C    | S>P  |        |     |          |      | T>C    | S>P  |        |     |
|           |      | 2472   | 751  |        |     |          |      | 2472   | 751  |        |     |
| A>G       | N>D  |        |      | A>G    | N>D |          |      |        |      |        |     |
| 2505      | 762  |        |      | 2505   | 762 |          |      |        |      |        |     |
|           |      |        |      | G>T    | R>I |          |      |        |      |        |     |
|           |      |        |      | 2572   | 784 |          |      |        |      |        |     |
|           |      | C>T    | T>M  |        |     |          |      | C>T    | T>M  |        |     |
|           |      | 2644   | 808  |        |     |          |      | 2644   | 808  |        |     |
| C>T       | P>S  | C>T    | P>S  | C>T    | P>S | C>T      | P>S  | C>T    | P>S  |        |     |
| 2895      | 892  | 2895   | 892  | 2895   | 892 | 2895     | 892  | 2895   | 892  |        |     |
| C>T       | P>S  |        |      |        |     |          |      |        |      | C>T    | P>S |
| 2928      | 903  |        |      |        |     |          |      |        |      | 2928   | 903 |
| C>T       | P>L  | C>T    | P>L  |        |     | C>T      | P>L  | C>T    | P>L  |        |     |
| 3325      | 1035 | 3325   | 1035 |        |     | 3325     | 1035 | 3325   | 1035 |        |     |
|           |      |        |      |        |     |          |      |        |      |        |     |
|           |      |        |      |        |     |          |      |        |      |        |     |
|           |      | C>T    | S>L  |        |     |          |      | C>T    | S>L  |        |     |
|           |      | 11836  | 14   |        |     |          |      | 11836  | 14   |        |     |
|           |      |        |      | A>G    | N>S |          |      |        |      |        |     |
|           |      |        |      | 11995  | 67  |          |      |        |      | A>G    | N>S |
| T>C       | Y>H  |        |      |        |     |          |      |        |      |        |     |
| 12234     | 147  |        |      |        |     |          |      |        |      |        |     |
|           |      |        |      |        |     |          |      |        |      |        |     |
|           |      |        |      |        |     |          |      |        |      |        |     |
|           |      | G>A    | A>T  |        |     |          |      | G>A    | A>T  |        |     |
|           |      | 12470  | 23   |        |     |          |      | 12470  | 23   |        |     |
|           |      |        |      |        |     |          |      |        |      | T>C    | S>P |
|           |      |        |      |        |     |          |      |        |      | 12575  | 58  |
| T>C       | S>P  | T>C    | S>P  | T>C    | S>P |          |      | T>C    | S>P  |        |     |
| 12689     | 96   | 12689  | 96   | 12689  | 96  |          |      | 12689  | 96   |        |     |
|           |      |        |      |        |     | G>A      | R>Q  |        |      |        |     |
|           |      |        |      |        |     | 13029    | 266  |        |      |        |     |
|           |      |        |      |        |     |          |      |        |      |        |     |
| T>C       | F>L  | T>C    | F>L  | T>C    | F>L | T>C      | F>L  | T>C    | F>L  | T>C    | F>L |
| 13571     | 25   | 13571  | 25   | 13571  | 25  | 13571    | 25   | 13571  | 25   | 13571  | 25  |
|           |      | A>G    | N>S  |        |     |          |      | A>G    | N>S  |        |     |
|           |      | 14014  | 174  |        |     |          |      | 14014  | 174  |        |     |
|           |      |        |      |        |     |          |      |        |      |        |     |
|           |      |        |      |        |     |          |      |        |      |        |     |

| P2-C-2012 |      |        |      |           |      |         |      |         |      |       |     |
|-----------|------|--------|------|-----------|------|---------|------|---------|------|-------|-----|
| 2012_4    |      | 2012_5 |      | 2012_6 ** |      | 2012_10 |      | 2012_11 |      |       |     |
| nt        | aa   | nt     | aa   | nt        | aa   | nt      | aa   | nt      | aa   |       |     |
| T>G       | L>W  |        |      |           |      | T>G     | L>W  | T>G     | L>W  |       |     |
| 1066      | 282  |        |      |           |      | 1066    | 282  | 1066    | 282  |       |     |
|           |      |        |      |           |      |         |      | A>G     | T>A  |       |     |
|           |      |        |      |           |      |         |      | 1484    | 425  |       |     |
| T>C       | S>P  | T>C    | S>P  | T>C       | S>P  | T>C     | S>P  |         |      |       |     |
| 2472      | 751  | 2472   | 751  | 2472      | 751  | 2472    | 751  |         |      |       |     |
|           |      |        |      |           |      |         |      | A>G     | N>D  |       |     |
|           |      |        |      |           |      |         |      | 2505    | 762  |       |     |
|           |      |        |      |           |      |         |      | G>T     | R>I  |       |     |
|           |      |        |      |           |      |         |      | 2572    | 784  |       |     |
| C>T       | T>M  | C>T    | T>M  | C>T       | T>M  | C>T     | T>M  |         |      |       |     |
| 2644      | 808  | 2644   | 808  | 2644      | 808  | 2644    | 808  |         |      |       |     |
| C>T       | P>S  | C>T    | P>S  | C>T       | P>S  | C>T     | P>S  | C>T     | P>S  |       |     |
| 2895      | 892  | 2895   | 892  | 2895      | 892  | 2895    | 892  | 2895    | 892  |       |     |
|           |      |        |      |           |      |         |      |         |      | C>T   | P>S |
|           |      |        |      |           |      |         |      |         |      | 2928  | 903 |
| C>T       | P>L  | C>T    | P>L  | C>T       | P>L  | C>T     | P>L  | C>T     | P>L  |       |     |
| 3325      | 1035 | 3325   | 1035 | 3325      | 1035 | 3325    | 1035 | 3325    | 1035 |       |     |
| C>T       | R>C  | C>T    | R>C  | C>T       | R>C  | C>T     | R>C  |         |      |       |     |
| 3879      | 1220 | 3879   | 1220 | 3879      | 1220 | 3879    | 1220 |         |      |       |     |
|           |      |        |      |           |      |         |      |         |      |       |     |
| C>T       | S>L  | C>T    | S>L  | C>T       | S>L  | C>T     | S>L  | C>T     | S>L  |       |     |
| 11836     | 14   | 11836  | 14   | 11836     | 14   | 11836   | 14   | 11836   | 14   |       |     |
|           |      |        |      |           |      |         |      |         |      | A>G   | N>S |
|           |      |        |      |           |      |         |      |         |      | 11995 | 67  |
|           |      |        |      |           |      |         |      |         |      |       |     |
|           |      |        |      |           |      |         |      |         |      |       |     |
| G>A       | A>T  | G>A    | A>T  | G>A       | A>T  | G>A     | A>T  | G>A     | A>T  |       |     |
| 12470     | 23   | 12470  | 23   | 12470     | 23   | 12470   | 23   | 12470   | 23   |       |     |
|           |      |        |      |           |      |         |      |         |      | T>C   | S>P |
|           |      |        |      |           |      |         |      |         |      | 12575 | 58  |
| T>C       | S>P  | T>C    | S>P  | T>C       | S>P  | T>C     | S>P  | T>C     | S>P  |       |     |
| 12689     | 96   | 12689  | 96   | 12689     | 96   | 12689   | 96   | 12689   | 96   |       |     |
|           |      |        |      |           |      |         |      |         |      | G>A   | R>Q |
|           |      |        |      |           |      |         |      |         |      | 13029 | 266 |
|           |      |        |      |           |      |         |      |         |      |       |     |
| T>C       | F>L  | T>C    | F>L  | T>C       | F>L  | T>C     | F>L  | T>C     | F>L  | T>C   | F>L |
| 13571     | 25   | 13571  | 25   | 13571     | 25   | 13571   | 25   | 13571   | 25   | 13571 | 25  |
|           |      | A>G    | N>S  |           |      |         |      | A>G     | N>S  |       |     |
|           |      | 14014  | 174  |           |      |         |      | 14014   | 174  |       |     |
|           |      |        |      |           |      |         |      |         |      |       |     |
|           |      |        |      |           |      |         |      |         |      |       |     |

**Figure S3:** Identification of non-conservative mutations in P1-I-2012 and P2-C-2012 sequences from inoculated and contact pigs from Trial#1 using the P0-2012 sequence as reference. Mutation location were indicated in nucleotide (nt) and amino acid (aa) sequences position, starting from the first nt of the 5' nontranslated region (5'NTR) on the KF991509.2 full-length sequence and the start codon of each open reading frame (ORF), respectively. \* Isolate from the pig No. 2012\_7 was used as inoculum in Inoc-N-Rev-T#3 inoculated pigs from Trial#3. \*\* Isolate from the pig No. 2012\_6 was used as inoculum in Inoc-Rev-T#3 inoculated pigs from Trial#3.

| P1-I-2017 |      |         |      |         |      |         |      |         |      |         |      | P2-C-2017 |      |         |      |         |      |         |      |         |      |         |     |
|-----------|------|---------|------|---------|------|---------|------|---------|------|---------|------|-----------|------|---------|------|---------|------|---------|------|---------|------|---------|-----|
| 2017_12   |      | 2017_13 |      | 2017_14 |      | 2017_18 |      | 2017_19 |      | 2017_20 |      | 2017_15   |      | 2017_16 |      | 2017_17 |      | 2017_21 |      | 2017_22 |      | 2017_23 |     |
| nt        | aa   | nt      | aa   | nt      | aa   | nt      | aa   | nt      | aa   | nt      | aa   | nt        | aa   | nt      | aa   | nt      | aa   | nt      | aa   | nt      | aa   | nt      | aa  |
|           |      |         |      |         |      |         |      | G>A     | G>S  | G>A     | G>N  |           |      |         |      |         |      |         |      |         |      |         |     |
|           |      |         |      |         |      |         |      | 1041    | 274  | 1041    | 274  |           |      |         |      |         |      |         |      |         |      |         |     |
| T>G       | L>W  |         |      |         |      |         |      | T>G     | L>W  | T>G     | L>W  |           |      |         |      |         |      |         |      |         |      |         |     |
| 1066      | 282  |         |      |         |      |         |      | 1066    | 282  | 1066    | 282  |           |      |         |      |         |      |         |      |         |      |         |     |
| A>G       | T>A  | A>G     | T>A  |         |      | A>G     | T>A  |         |      |         |      | A>G       | T>A  | A>G     | T>A  |         |      | A>G     | T>A  | A>G     | T>A  | A>G     | T>A |
| 1484      | 425  | 1484    | 425  |         |      | 1484    | 425  |         |      |         |      | 1484      | 425  | 1484    | 425  |         |      | 1484    | 425  | 1484    | 425  | 1484    | 425 |
| A>G       | N>D  | A>G     | N>D  | A>G     | N>D  | A>G     | N>D  |         |      | A>G     | N>D  | A>G       | N>D  | A>G     | N>D  | A>G     | N>D  | A>G     | N>D  | A>G     | N>D  |         |     |
| 2505      | 762  | 2505    | 762  | 2505    | 762  | 2505    | 762  |         |      | 2505    | 762  | 2505      | 762  | 2505    | 762  | 2505    | 762  | 2505    | 762  | 2505    | 762  |         |     |
|           |      |         |      | G>T     | R>I  |         |      |         |      |         |      | G>T       | R>I  |         |      |         |      |         |      |         |      |         |     |
|           |      |         |      | 2572    | 784  |         |      |         |      |         |      | 2572      | 784  |         |      |         |      |         |      |         |      |         |     |
| C>T       | P>S  | C>T     | P>S  | C>T     | P>S  | C>T     | P>S  | C>T     | P>S  | C>T     | P>S  | C>T       | P>S  | C>T     | P>S  | C>T     | P>S  | C>T     | P>S  | C>T     | P>S  | C>T     | P>S |
| 2895      | 892  | 2895    | 892  | 2895    | 892  | 2895    | 892  | 2895    | 892  | 2895    | 892  | 2895      | 892  | 2895    | 892  | 2895    | 892  | 2895    | 892  | 2895    | 892  | 2895    | 892 |
| C>T       | P>S  | C>T     | P>S  | C>T     | P>S  | C>T     | P>S  | C>T     | P>S  | C>T     | P>S  | C>T       | P>S  | C>T     | P>S  | C>T     | P>S  | C>T     | P>S  | C>T     | P>S  |         |     |
| 2928      | 903  | 2928    | 903  | 2928    | 903  | 2928    | 903  |         |      | 2928    | 903  | 2928      | 903  | 2928    | 903  | 2928    | 903  | 2928    | 903  | 2928    | 903  |         |     |
| C>T       | P>L  | C>T     | P>L  | C>T     | P>L  | C>T     | P>L  | C>T     | P>L  | C>T     | P>L  | C>T       | P>L  | C>T     | P>L  | C>T     | P>L  | C>T     | P>L  | C>T     | P>L  |         |     |
| 3325      | 1035 | 3325    | 1035 | 3325    | 1035 | 3325    | 1035 | 3325    | 1035 | 3325    | 1035 | 3325      | 1035 | 3325    | 1035 | 3325    | 1035 | 3325    | 1035 | 3325    | 1035 |         |     |
| C>A       | P>Q  |         |      |         |      |         |      |         |      |         |      | C>A       | P>Q  |         |      |         |      | C>A     | P>Q  |         |      |         |     |
| 3463      | 1081 |         |      |         |      |         |      |         |      |         |      | 3463      | 1081 |         |      |         |      | 3463    | 1081 |         |      |         |     |
| T>C       | L>P  |         |      |         |      |         |      |         |      |         |      | T>C       | L>P  |         |      |         |      | T>C     | L>P  |         |      |         |     |
| 6862      | 2214 |         |      |         |      |         |      |         |      |         |      | 6862      | 2214 |         |      |         |      | 6862    | 2214 |         |      |         |     |
|           |      |         |      |         |      |         |      |         |      |         |      |           |      |         |      |         |      |         |      |         |      |         |     |
|           |      | C>T     | S>L  |         |      |         |      | C>T     | S>L  |         |      | C>T       | S>L  |         |      |         |      |         |      |         |      |         |     |
|           |      | 11836   | 14   |         |      |         |      | 11836   | 14   |         |      | 11836     | 14   |         |      |         |      |         |      |         |      |         |     |
|           |      |         |      | A>G     | N>S  | A>G     | N>S  |         |      |         |      |           |      | A>G     | N>S  | A>G     | N>S  |         |      |         |      |         |     |
|           |      |         |      | 11995   | 67   | 11995   | 67   |         |      |         |      |           |      | 11995   | 67   | 11995   | 67   |         |      |         |      |         |     |
|           |      |         |      |         |      |         |      |         |      | T>A     | Y>N  |           |      |         |      |         |      | T>C     | Y>H  |         |      |         |     |
|           |      |         |      |         |      |         |      |         |      | 12234   | 147  |           |      |         |      |         |      | 12234   | 147  |         |      |         |     |
|           |      |         |      |         |      |         |      |         |      |         |      |           |      |         |      |         |      |         |      |         |      |         |     |
|           |      |         |      | T>C     | S>P  |         |      |         |      |         |      |           |      | T>C     | S>P  |         |      |         |      |         |      |         |     |
|           |      |         |      | 12575   | 58   |         |      |         |      |         |      |           |      | 12575   | 58   |         |      |         |      |         |      |         |     |
|           |      | T>C     | S>P  |         |      |         |      | T>C     | S>P  | T>C     | S>P  |           |      |         |      | T>C     | S>P  |         |      |         |      |         |     |
|           |      | 12689   | 96   |         |      |         |      | 12689   | 96   | 12689   | 96   |           |      |         |      | 12689   | 96   |         |      |         |      |         |     |
|           |      |         |      | G>A     | R>Q  |         |      |         |      |         |      |           |      | G>A     | R>Q  |         |      |         |      |         |      |         |     |
|           |      |         |      | 13029   | 266  |         |      |         |      |         |      |           |      | 13029   | 266  |         |      |         |      |         |      |         |     |
| C>T       | H>Y  |         |      |         |      |         |      |         |      |         |      | C>T       | H>Y  |         |      |         |      | C>T     | H>Y  |         |      |         |     |
| 13270     | 109  |         |      |         |      |         |      |         |      |         |      | 13270     | 109  |         |      |         |      | 13270   | 109  |         |      |         |     |
|           |      |         |      |         |      |         |      |         |      |         |      |           |      |         |      |         |      |         |      |         |      |         |     |
| T>C       | F>L  | T>C     | F>L  | T>C     | F>L  | T>C     | F>L  | T>C     | F>L  | T>C     | F>L  | T>C       | F>L  | T>C     | F>L  | T>C     | F>L  | T>C     | F>L  | T>C     | F>L  |         |     |
| 13571     | 25   | 13571   | 25   | 13571   | 25   | 13571   | 25   | 13571   | 25   | 13571   | 25   | 13571     | 25   | 13571   | 25   | 13571   | 25   | 13571   | 25   | 13571   | 25   |         |     |
|           |      |         |      |         |      |         |      |         |      |         |      |           |      |         |      |         |      |         |      |         |      |         |     |
|           |      |         |      |         |      |         |      |         |      |         |      |           |      |         |      |         |      |         |      |         |      |         |     |

**Figure S4:** Identification of non-conservative mutations in P1-I-2017 and P2-C-2017 sequences from inoculated and contact pigs from Trial#2 using the P0-2017 sequence as reference. Mutation location were indicated in nucleotide (nt) and amino acid (aa) sequences position, starting from the first nt of the 5' nontranslated region (5'NTR) on the KF991509.2 full-length sequence and the start codon of each open reading frame (ORF), respectively.
